# Supplementary material for: Combining radiomic phenotypes of non-small cell lung cancer with liquid biopsy data may improve prediction of response to EGFR inhibitors
Source: PubMed Central journal article supplement (PMC8113313; doi:10.1038/s41598-021-88239-y), 2021-05-11
Supplement: 41598_2021_88239_MOESM1_ESM.pdf [file 41598_2021_88239_MOESM1_ESM.pdf]

## **Combining radiomic phenotypes of non-small cell lung cancer with liquid biopsy data may improve prediction of response to *EGFR* inhibitors**

Bardia Yousefi <sup>1</sup>, Michael J. LaRiviere <sup>2</sup>, Eric A. Cohen <sup>1</sup>, Thomas H. Buckingham <sup>3</sup>, Stephanie S. Yee <sup>3</sup>, Taylor A. Black <sup>3</sup>, Austin L. Chien <sup>3</sup>, Peter Noël <sup>1</sup>, Wei-Ting Hwang <sup>4</sup>, Sharyn I. Katz <sup>1</sup>, Charu Aggarwal<sup>3</sup>, Jeffrey C. Thompson <sup>5</sup>, Erica L. Carpenter <sup>3§</sup>, Despina Kontos <sup>1§\*</sup>

<sup>1</sup> Department of Radiology, University of Pennsylvania, Philadelphia, PA 19104

<sup>2</sup> Department of Radiation Oncology, University of Pennsylvania, Philadelphia, PA 19104

<sup>3</sup> Department of Medicine, Division of Hematology and Oncology, University of Pennsylvania, Philadelphia, PA 19104

<sup>4</sup> Department of Biostatistics, Epidemiology and Informatics, University of Pennsylvania, Philadelphia, PA 19104

<sup>5</sup> Department of Medicine, Section of Interventional Pulmonology, University of Pennsylvania, Philadelphia, PA 19104

§ co-senior authors

\* **Corresponding author:**

Despina Kontos  
Computational Biomarker Imaging Group (CBIG)  
University of Pennsylvania, Department of Radiology  
Rm D702 Richards Bldg., 3700 Hamilton Walk  
Philadelphia, PA 19104  
Office telephone: 215-746-4064  
Telephone of the laboratory: 215-746-4060  
Email: [Despina.Kontos@pennmedicine.upenn.edu](mailto:Despina.Kontos@pennmedicine.upenn.edu)

## Supplemental Material

**Table S1: Imaging acquisition parameters for CT scans**

| CT imaging parameters        |                      |                    |
|------------------------------|----------------------|--------------------|
| Characteristic               | Siemens Healthineers | GE Medical Systems |
| Scanner                      | 24                   | 16                 |
| Contrast Enhanced (CE)       |                      |                    |
| CE                           | 20                   | 13                 |
| Non-CE                       | 4                    | 3                  |
| Convolution Kernel           |                      |                    |
| Standard (soft-tissue)       | 8                    | 4                  |
| Hard (lung)                  | 16                   | 12                 |
| Exposure (mAs)               | 109 (43, 242)        | 7 (1,74)           |
| Focal Spots (mm)             |                      |                    |
| 0.8                          | 4                    | 2                  |
| 1.2                          | 20                   | 14                 |
| Tube Voltage (kVp)           | 100 (90,140)         | 120                |
| Tube Current (mA)            | 184 (69,2383)        | 150 (114,649)      |
| Spiral Pitch Factor          | 0.8 (0.6, 2.45)      | 1.07 (0.98,1.38)   |
| Unspecified cases            | -                    | 6                  |
| Reconstruction Diameter (mm) | 401 (324,500)        | 483 (349,483)      |

**Table S2: Association of contrast-enhanced versus non-contrast-enhanced image type with radiomic phenotype**

|             | Non-contrast-enhanced           | Contrast-enhanced | p <sup>1</sup> |
|-------------|---------------------------------|-------------------|----------------|
|             | <i>n</i> (percent of phenotype) |                   |                |
| phenotype 1 | 4 (19%)                         | 17 (81%)          | 1              |
| phenotype 2 | 3 (15.8%)                       | 16 (84.2%)        |                |

1. *p* value by Fisher's exact test.

**Table S3: Association of other CT parameters with radiomic phenotype**

| parameter    | p <sup>1</sup> |
|--------------|----------------|
| Spiral pitch | 0.26           |
| Tube voltage | 0.13           |
| Tube current | 0.68           |

1. *p* value by Mann-Whitney-Wilcoxon test, two-sided.

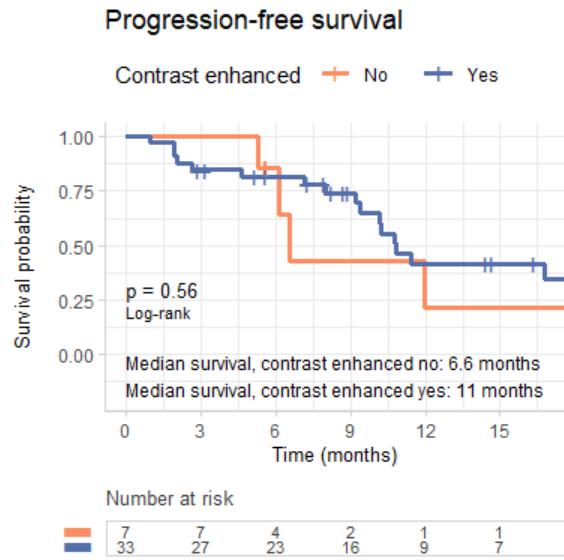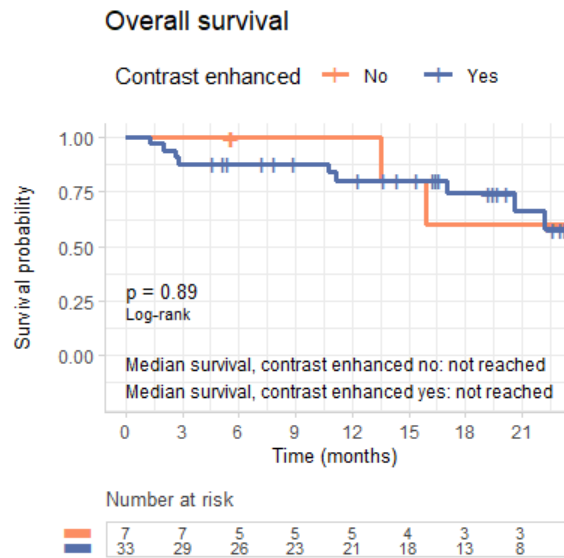

**Figure S1: Association of contrast-enhanced versus non-contrast-enhanced image type with progression-free and overall survival outcomes**

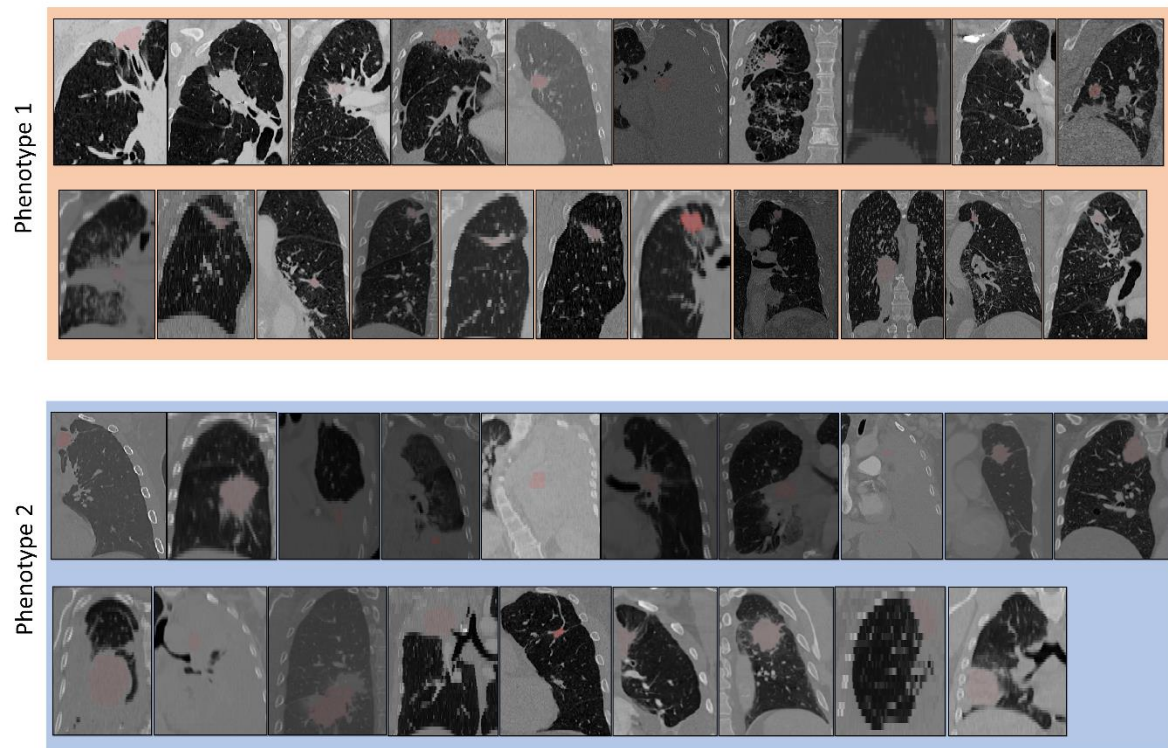

**Figure S2: Tumors cluster in the two phenotypes.** Visualizations of the original CT images with tumors in field of view for phenotypes 1 (n=21) and 2 (n=19). Most cancers in phenotype 1 appear to be relatively smaller, with elongated shape, convex borders and adjacent linear opacities, while cancers in phenotype 2 are generally larger and have more ground-glass, irregular, and indistinct border characteristics suggestive of potential inflammatory changes that may be related to their observed worse PFS and OS outcomes. The tumor area is highlighted by 5-10% opacity for demonstration purposes.
